# Supplementary material for: Biochemical studies on sphingolipids of Artemia franciscana: complex neutral glycosphingolipids
Source: PubMed Central journal article supplement (PMC3606520; doi:10.1007/s10719-012-9436-8), 2012-08-14
Supplement: 10719_2012_9436_MOESM1_ESM.pdf [file 10719_2012_9436_MOESM1_ESM.pdf]

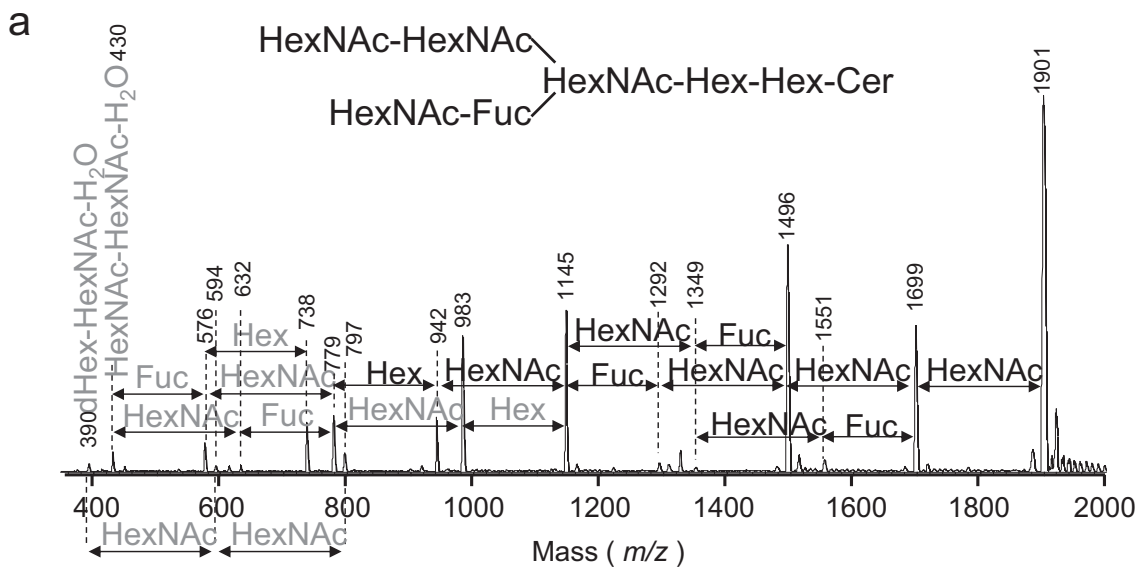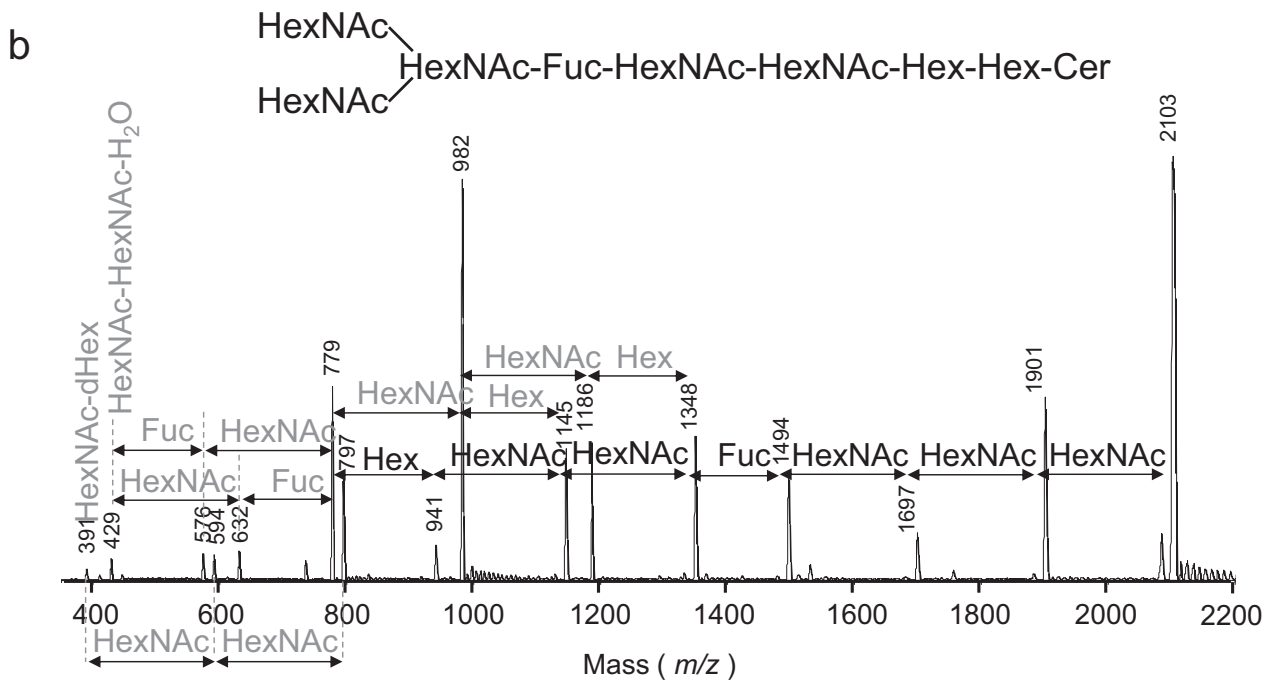

Supplemental fig. 1

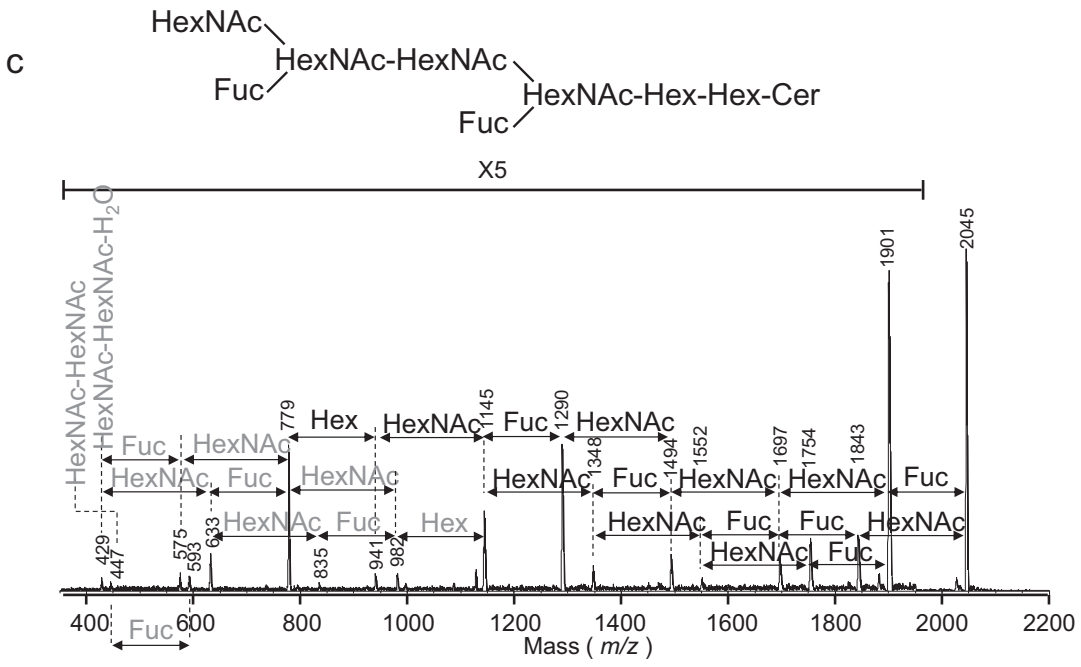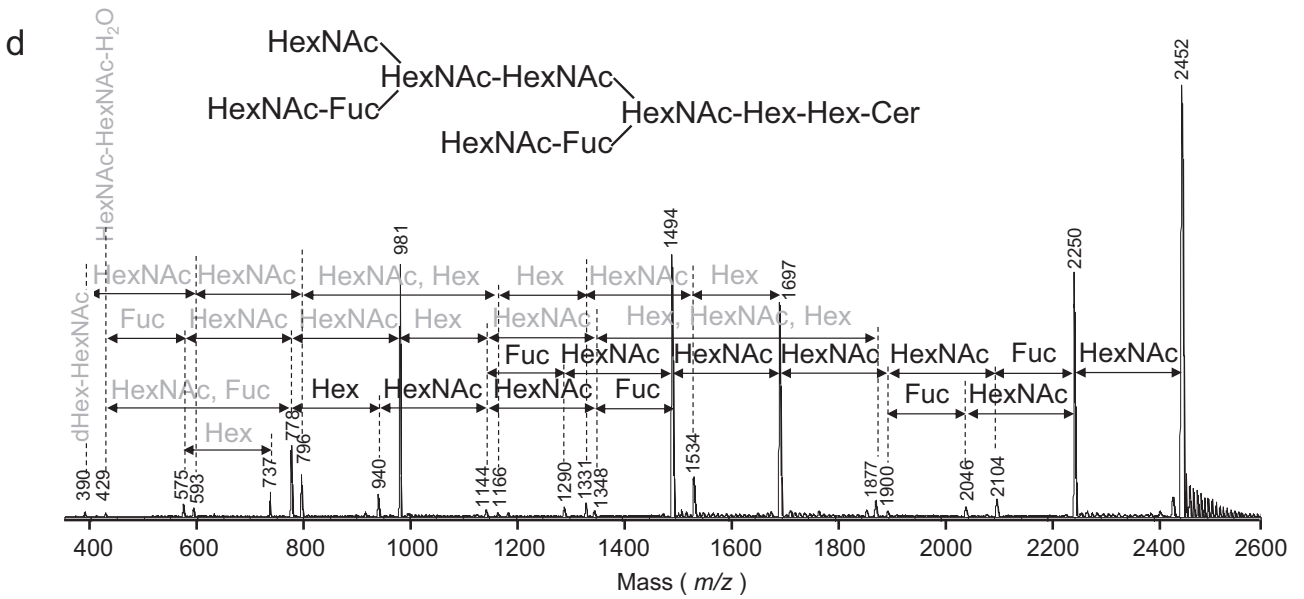

Supplemental fig. 1 (Cont.)
