# Supplementary material for: Biochemical studies on sphingolipids of Artemia franciscana: complex neutral glycosphingolipids
Source: PubMed Central journal article supplement (PMC3606520; doi:10.1007/s10719-012-9436-8), 2012-08-14
Supplement: 10719_2012_9436_MOESM2_ESM.pdf [file 10719_2012_9436_MOESM2_ESM.pdf]

**Supplemental Table** Summary of MALDI-TOF MS spectra obtained for complex GSLs purified from *A. franciscana*.

Symbols A and B, denoted in the left column, show predominant peaks mentioned in Fig. 3. % distribution was

calculated using % value of aliphatic component analysis. tr: trace

| FA - LCB       | CHpS <sub>1</sub> |         |                | CHpS <sub>2</sub> |         |                | COS <sub>1</sub> |         |                |
|----------------|-------------------|---------|----------------|-------------------|---------|----------------|------------------|---------|----------------|
|                | Calc.             | Found   | % distribution | Calc.             | Found   | % distribution | Calc.            | Found   | % distribution |
| 16:0 - d16:1   | 1814.95           |         |                | 1814.95           |         |                | 2018.03          |         |                |
| 16:0 - d17:1   | 1828.97           |         |                | 1828.97           |         |                | 2032.05          |         |                |
| 18:0 - d16:1   | 1842.98           | 1843.27 | 2.5            | 1842.98           | 1842.72 | 3.9            | 2046.06          | 2045.74 | 3.2            |
| 18:0 - d17:1   | 1857.00           | 1858.35 | 1.2            | 1857.00           | 1857.74 | 1.7            | 2060.08          | 2059.78 | 1.6            |
| 20:0 - d16:1   | 1871.01           | 1872.38 | 1.0            | 1871.01           | 1871.77 | 1.4            | 2074.09          | 2073.80 | 1.2            |
| 20:0 - d17:1   | 1885.03           | 1885.43 | ) 0.5          | 1885.03           | 1884.81 | ) 1.4          | 2088.11          | 2087.82 | ) 1.3          |
| 21:0 - d16:1   | 1885.03           | 1885.43 |                | 1885.03           | 1884.81 |                | 2088.11          | 2087.82 |                |
| 22:1 - d16:1   | 1897.03           | 1897.50 | 2.8            | 1897.03           | 1896.85 | 2.6            | 2100.11          | 2099.85 | 2.5            |
| A 22:0 - d16:1 | 1899.05           | 1899.47 | 56.2           | 1899.05           | 1898.82 | 58.5           | 2102.13          | 2101.84 | 54.0           |
| 22:1 - d17:1   | 1911.05           | 1911.42 | 1.4            | 1911.05           | 1910.78 | 1.2            | 2114.13          | 2113.81 | 1.3            |
| B 22:0 - d17:1 | 1913.06           | 1913.42 | ) 29.0         | 1913.06           | 1912.78 | ) 26.7         | 2116.14          | 2115.81 | ) 29.0         |
| 23:0 - d16:1   | 1913.06           | 1913.42 |                | 1913.06           | 1912.78 |                | 2116.14          | 2115.81 |                |
| 24:1 - d16:1   | 1925.06           | 1925.36 | 0.7            | 1925.06           | 1924.73 | tr             | 2128.14          | 2129.77 | 0.9            |
| 23:0 - d17:1   | 1927.08           | 1927.36 | ) 2.4          | 1927.08           | 1926.74 | ) 1.7          | 2130.16          | 2131.76 | ) 2.1          |
| 24:0 - d16:1   | 1927.08           | 1927.36 |                | 1927.08           | 1926.74 |                | 2130.16          | 2131.76 |                |
| 24:1 - d17:1   | 1939.08           | 1939.38 | 0.3            | 1939.08           | 1938.76 | tr             | 2142.16          | 2143.77 | 0.5            |
| 24:0 - d17:1   | 1941.09           | 1941.39 | 1.0            | 1941.09           | 1940.76 | 0.6            | 2144.17          | 2145.77 | 0.9            |

| FA - LCB       | COS <sub>2</sub> |         | CNS     |         | CDeS    |         | % distribution |
|----------------|------------------|---------|---------|---------|---------|---------|----------------|
|                | Calc.            | Found   | Calc.   | Found   | Calc.   | Found   |                |
| 16:0 - d16:1   | 1961.01          |         | 2164.09 |         | 2367.17 | 2367.32 | 2.6            |
| 16:0 - d17:1   | 1975.03          |         | 2178.10 |         | 2381.18 | 2381.37 | 1.5            |
| 18:1 - d16:1   | 1987.03          |         | 2190.10 |         | 2393.18 | 2393.38 | 2.1            |
| 18:0 - d16:1   | 1989.04          | 1988.89 | 2192.12 | 2192.24 | 2395.20 | 2395.39 | 3.6            |
| 18:1 - d17:1   | 2001.04          |         | 2204.12 |         | 2407.20 | 2407.36 | 1.3            |
| 18:0 - d17:1   | 2003.06          | 2002.92 | 2206.14 | 2206.27 | 2409.22 | 2409.40 | 2.2            |
| 20:0 - d16:1   | 2017.07          | 2016.92 | 2220.15 | 2220.27 | 2423.23 | 2423.41 | 1.3            |
| 20:0 - d17:1   | 2031.09          | 2030.95 | 2234.17 | 2234.33 | 2437.25 | 2437.44 | ) 1.4          |
| 21:0 - d16:1   | 2031.09          | 2030.95 | 2234.17 | 2234.33 | 2437.25 | 2437.44 |                |
| 22:1 - d16:1   | 2043.09          | 2042.95 | 2246.17 | 2246.43 | 2449.25 | 2449.46 | 0.7            |
| A 22:0 - d16:1 | 2045.10          | 2044.96 | 2248.18 | 2248.38 | 2451.26 | 2451.45 | 49.5           |
| 22:1 - d17:1   | 2057.10          | 2056.95 | 2260.18 | 2260.29 | 2463.26 | 2463.42 | 0.4            |
| B 22:0 - d17:1 | 2059.12          | 2058.95 | 2262.20 | 2262.31 | 2465.28 | 2465.42 | ) 30.6         |
| 23:0 - d16:1   | 2059.12          | 2058.95 | 2262.20 | 2262.31 | 2465.28 | 2465.42 |                |
| 24:1 - d16:1   | 2071.12          | 2072.95 | 2274.20 | 2274.17 | 2477.28 |         |                |
| 23:0 - d17:1   | 2073.14          | 2074.93 | 2276.21 | 2276.24 | 2479.29 | 2479.39 | ) 1.7          |
| 24:0 - d16:1   | 2073.14          | 2074.93 | 2276.21 | 2276.24 | 2479.29 | 2479.39 |                |
| 24:1 - d17:1   | 2085.14          |         | 2288.21 |         | 2491.29 |         |                |
| 24:0 - d17:1   | 2087.15          |         | 2290.23 | 2290.29 | 2493.31 | 2493.41 | 0.8            |
